# Supplementary material
Source: PubMed Central journal article supplement (PMC58706)

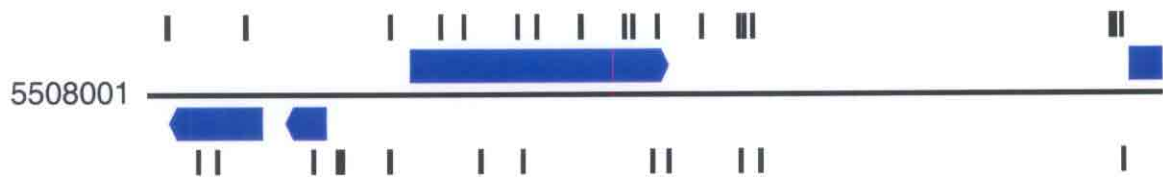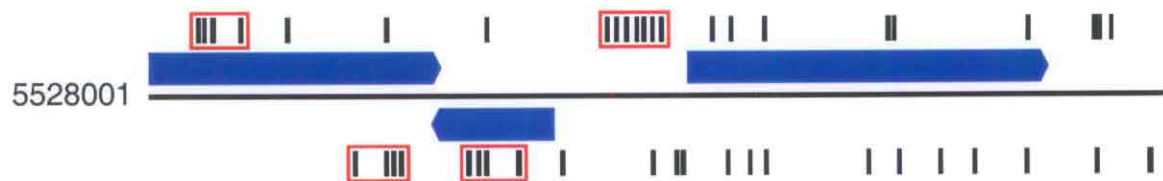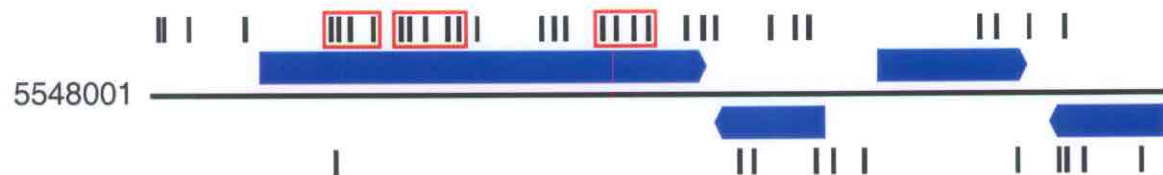

Supplement: pnas_98_20_11193__3.pdf [file pnas_98_20_11193__3.pdf]
